# Supplementary material
Source: PubMed Central journal article supplement (PMC3614127)
Supplement: 11606_2012_2202_MOESM2_ESM.pdf [file 11606_2012_2202_MOESM2_ESM.pdf]

Figure 2A: 24-hour Average Hot Flash Severity by Group over Time

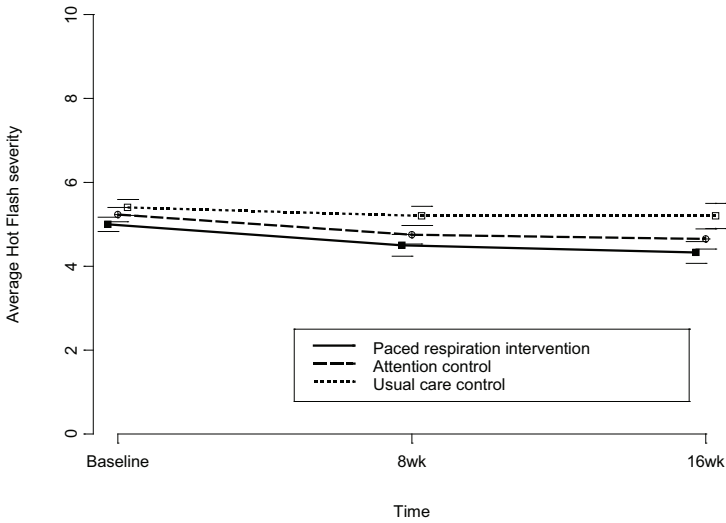

Figure 2B: 24-hour Average Hot Flash Bother by Group over Time

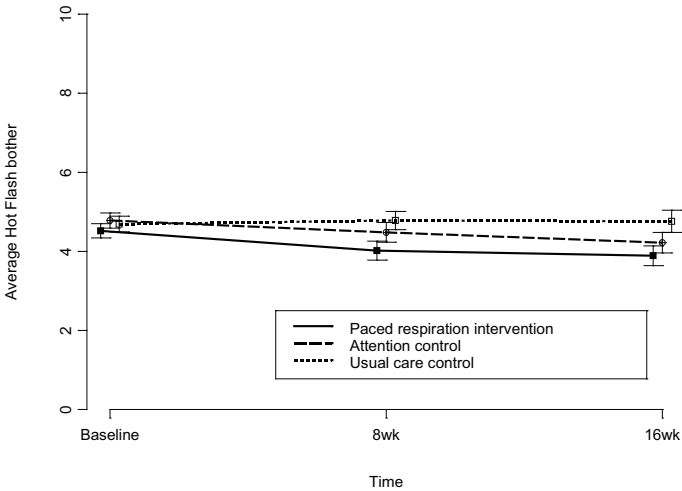

Legend: Data points are unadjusted means and standard errors with 95% confidence interval error bars. Severity and bother were rated from 0 (not at all) to 10 (extremely) and averaged over 24-hours. No significant differences at 8- or 16-weeks.
